# Supplementary material for: tRNA-Derived RNA Fragments Are Novel Biomarkers for Diagnosis, Prognosis, and Tumor Subtypes in Prostate Cancer
Source: MDPI journal article supplement (doi:10.3390/curroncol30010075), 2023-01-10
Supplement: s1 [file s1]

**tRNA-derived RNA fragments are novel biomarkers for diagnosis, prognosis, and  
tumor subtypes in prostate cancer**

**Supplementary Materials**

**Table S1** 5'-tRFs are differentially expressed between PRAD tumor and adjacent normal tissues\*

| tRFs                          | Log(FC) | P value  |
|-------------------------------|---------|----------|
| Upregulated                   |         |          |
| 5'-M-tRNA-Glu-TTC-1-2_L30     | 3.676   | 8.74E-31 |
| 5'-M-tRNA-Glu-TTC-2-2_L30     | 3.166   | 2.18E-29 |
| 5'-M-tRNA-Gly-GCC-5-1_L30     | 2.888   | 6.07E-90 |
| 5'-M-tRNA-Gly-GCC-5-1_L29     | 2.787   | 3.95E-26 |
| 5'-M-tRNA-Val-CAC-5-1_L30     | 2.581   | 1.37E-28 |
| 5'-M-tRNA-Gly-GCC-5-1_L28     | 2.56    | 1.86E-28 |
| 5'-M-tRNA-Glu-CTC-2-1_L29     | 2.551   | 1.99E-26 |
| 5'-M-tRNA-Gly-GCC-1-5_L30     | 2.432   | 3.30E-25 |
| 5'-M-tRNA-Glu-CTC-2-1_L30     | 2.405   | 1.07E-29 |
| 5'-M-tRNA-His-GTG-1-9_L30     | 2.32    | 4.50E-29 |
| 5'-M-tRNA-Gln-CTG-5-1_L30     | 2.306   | 3.26E-24 |
| 5'-M-tRNA-Leu-CAG-2-2_L30     | 2.051   | 3.64E-31 |
| 5'-M-tRNA-Cys-GCA-4-1_L29     | 2.01    | 2.74E-25 |
| 5'-M-tRNA-Gln-TTG-4-1_L30     | 1.978   | 6.40E-30 |
| 5'-M-tRNA-Tyr-GTA-chr21-2_L30 | 1.932   | 8.47E-24 |
| 5'-M-tRNA-Gln-CTG-5-1_L29     | 1.918   | 2.24E-29 |
| 5'-M-tRNA-Ala-TGC-4-1_L24     | 1.865   | 1.23E-31 |
| 5'-tRNA-Gly-TCC-1-1_L30       | 1.857   | 2.82E-29 |
| 5'-M-tRNA-Gly-CCC-2-2_L29     | 1.828   | 1.37E-24 |
| 5'-M-tRNA-Gly-GCC-5-1_L27     | 1.809   | 3.03E-26 |
| 5'-M-tRNA-Gln-TTG-3-3_L30     | 1.709   | 1.10E-28 |
| 5'-M-tRNA-Lys-TTT-5-1_L30     | 1.69    | 5.22E-26 |
| 5'-M-tRNA-Arg-TCG-1-1_L19     | 1.663   | 1.42E-11 |
| 5'-M-tRNA-Leu-TAG-1-1_L26     | 1.631   | 6.42E-32 |
| 5'-M-tRNA-Ser-TGA-4-1_L24     | 1.627   | 1.33E-28 |
| 5'-M-tRNA-Tyr-GTA-3-1_L25     | 1.612   | 4.58E-31 |
| 5'-M-tRNA-Pro-TGG-3-5_L30     | 1.576   | 3.61E-29 |
| 5'-M-tRNA-Ser-TGA-4-1_L25     | 1.558   | 9.97E-32 |
| 5'-M-tRNA-Glu-CTC-2-1_L28     | 1.555   | 5.34E-26 |
| 5'-M-tRNA-Leu-CAG-2-2_L25     | 1.511   | 3.38E-32 |
| 5'-M-tRNA-Val-TAC-1-2_L30     | 1.478   | 8.31E-28 |
| 5'-M-tRNA-Leu-TAG-1-1_L30     | 1.473   | 6.35E-27 |
| 5'-M-tRNA-Val-CAC-5-1_L23     | 1.469   | 8.03E-28 |
| 5'-M-tRNA-Leu-TAG-1-1_L21     | 1.462   | 1.45E-12 |
| 5'-tRNA-Val-CAC-8-1_L30       | 1.426   | 5.45E-29 |
| 5'-M-tRNA-Gly-GCC-1-5_L29     | 1.422   | 4.97E-18 |
| 5'-M-tRNA-Tyr-GTA-7-1_L25     | 1.416   | 4.03E-28 |
| 5'-M-tRNA-Leu-TAG-1-1_L25     | 1.412   | 3.20E-32 |
| 5'-M-tRNA-Ser-GCT-5-1_L24     | 1.398   | 9.71E-32 |
| 5'-tRNA-Arg-TCT-1-1_L19       | 1.349   | 1.08E-09 |
| 5'-M-tRNA-Gly-TCC-4-1_L23     | 1.305   | 5.11E-27 |

|                            |        |          |
|----------------------------|--------|----------|
| 5'-tRNA-Leu-TAA-1-1_L25    | 1.269  | 4.82E-32 |
| 5'-M-tRNA-iMet-CAT-2-1_L30 | 1.264  | 2.54E-30 |
| 5'-M-tRNA-Leu-CAG-2-2_L26  | 1.246  | 1.18E-30 |
| 5'-tRNA-Pro-TGG-2-1_L30    | 1.234  | 3.29E-29 |
| 5'-M-tRNA-Glu-TTC-2-2_L28  | 1.221  | 2.54E-25 |
| 5'-tRNA-Glu-TTC-9-1_L30    | 1.209  | 1.54E-29 |
| 5'-M-tRNA-Lys-CTT-3-1_L30  | 1.194  | 1.59E-25 |
| 5'-M-tRNA-Thr-CGT-4-1_L24  | 1.187  | 3.03E-27 |
| 5'-tRNA-Arg-CCG-2-1_L30    | 1.185  | 8.86E-26 |
| 5'-M-tRNA-Arg-ACG-2-4_L19  | 1.184  | 6.47E-12 |
| 5'-M-tRNA-Lys-CTT-4-1_L30  | 1.181  | 3.57E-28 |
| 5'-tRNA-Val-AAC-2-1_L20    | 1.174  | 3.19E-11 |
| 5'-M-tRNA-Arg-TCT-5-1_L19  | 1.148  | 1.14E-11 |
| 5'-M-tRNA-Gly-TCC-2-6_L30  | 1.136  | 4.30E-25 |
| 5'-M-tRNA-Leu-TAG-1-1_L24  | 1.069  | 1.86E-31 |
| 5'-M-tRNA-Ser-CGA-2-1_L25  | 1.052  | 5.89E-31 |
| 5'-tRNA-Val-TAC-2-1_L30    | 1.036  | 4.94E-23 |
| 5'-tRNA-Val-AAC-2-1_L23    | 1.031  | 7.78E-27 |
| 5'-M-tRNA-Gln-CTG-5-1_L23  | 1.029  | 6.64E-29 |
| 5'-M-tRNA-Leu-TAG-1-1_L22  | 1.018  | 2.59E-24 |
| 5'-M-tRNA-Ala-TGC-4-1_L22  | 1.013  | 1.17E-23 |
| 5'-M-tRNA-Tyr-GTA-7-1_L23  | 1.006  | 4.27E-20 |
| Dowregulated               |        |          |
| 5'-M-tRNA-Leu-TAG-3-1_L15  | -1.005 | 4.38E-12 |
| 5'-M-tRNA-Glu-TTC-1-2_L16  | -1.129 | 4.85E-27 |
| 5'-M-tRNA-Val-TAC-3-1_L15  | -1.271 | 2.59E-18 |
| 5'-M-tRNA-Ser-TGA-4-1_L18  | -1.296 | 2.58E-19 |
| 5'-M-tRNA-Gly-CCC-2-2_L15  | -1.409 | 6.11E-26 |
| 5'-M-tRNA-Ser-TGA-4-1_L15  | -1.431 | 1.63E-13 |
| 5'-M-tRNA-Val-CAC-7-1_L15  | -1.518 | 1.38E-17 |

\*Note: The top 13 upregulated 5'-tRFs (highlighted by bold font) were used to build tRF classifiers for diagnosis of PRAD.

**Table S2** Univariate Cox regression analysis confirms 5'-tRF association with PRAD prognosis\*

| tRF                              | Z-score | HR   | Low95%CI | High95%CI | Wald test | Log-rank test |
|----------------------------------|---------|------|----------|-----------|-----------|---------------|
| <b>5'-tRNA-Arg-TCG-3-1_L18</b>   | -2.79   | 0.49 | 0.30     | 0.81      | 0.005     | 0.001         |
| <b>5'-M-tRNA-Val-AAC-6-1_L20</b> | -2.21   | 0.60 | 0.39     | 0.95      | 0.027     | 0.003         |
| <b>5'-M-tRNA-Glu-TTC-1-2_L16</b> | -2.56   | 0.48 | 0.28     | 0.84      | 0.01      | 0.004         |
| <b>5'-tRNA-Glu-TTC-9-1_L30</b>   | 2.16    | 1.47 | 1.04     | 2.07      | 0.031     | 0.006         |
| <b>5'-M-tRNA-Ser-TGA-4-1_L15</b> | -2.36   | 0.75 | 0.59     | 0.95      | 0.018     | 0.007         |
| <b>5'-M-tRNA-Leu-TAG-1-1_L17</b> | -2.84   | 0.36 | 0.18     | 0.73      | 0.005     | 0.010         |
| <b>5'-M-tRNA-Arg-CCT-4-1_L18</b> | -2.74   | 0.60 | 0.42     | 0.87      | 0.006     | 0.014         |
| <b>5'-M-tRNA-Ala-TGC-4-1_L23</b> | 2.15    | 1.29 | 1.02     | 1.63      | 0.032     | 0.016         |
| <b>5'-M-tRNA-Lys-TTT-5-1_L22</b> | 2.49    | 1.73 | 1.12     | 2.65      | 0.013     | 0.024         |
| 5'-tRNA-Arg-TCG-3-1_L19          | -1.98   | 0.83 | 0.68     | 1.00      | 0.048     | 0.025         |
| <b>5'-M-tRNA-Ala-TGC-4-1_L16</b> | -2.60   | 0.49 | 0.29     | 0.84      | 0.009     | 0.028         |
| 5'-M-tRNA-Arg-TCG-1-1_L18        | -2.24   | 0.74 | 0.57     | 0.96      | 0.025     | 0.032         |
| <b>5'-M-tRNA-Ala-TGC-4-1_L24</b> | 2.09    | 1.34 | 1.02     | 1.77      | 0.037     | 0.034         |
| <b>5'-M-tRNA-Gly-GCC-1-5_L22</b> | 2.00    | 1.43 | 1.01     | 2.04      | 0.046     | 0.037         |
| 5'-M-tRNA-Gly-TCC-4-1_L18        | -2.41   | 0.63 | 0.43     | 0.92      | 0.016     | 0.042         |
| <b>5'-M-tRNA-Lys-TTT-5-1_L23</b> | 2.64    | 1.79 | 1.16     | 2.76      | 0.008     | 0.05          |

\*Note: These identified 5'-tRFs with marginal significance were further subjected to variable selection using LASSO (the one highlighted by bold font).

**Table S3** Multivariate Cox regression analysis reveals eight 5'-tRFs showing significant association with PRAD prognosis\*

| <b>tRFs</b>               | <b>coef</b> | <b>HR</b> | <b>Z-score</b> | <b>P value</b> | <b>Low95%CI</b> | <b>High95%CI</b> |
|---------------------------|-------------|-----------|----------------|----------------|-----------------|------------------|
| 5'-tRNA-Arg-TCG-3-1_L18   | -0.4808     | 0.6183    | -1.4631        | 0.1434         | 0.3247          | 1.1774           |
| 5'-M-tRNA-Glu-TTC-1-2_L16 | -0.8764     | 0.4163    | -3.0229        | 0.0025         | 0.2358          | 0.7348           |
| 5'-tRNA-Glu-TTC-9-1_L30   | 0.3224      | 1.3805    | 1.6809         | 0.0928         | 0.9479          | 2.0106           |
| 5'-M-tRNA-Leu-TAG-1-1_L17 | -0.5624     | 0.5698    | -1.5320        | 0.1255         | 0.2775          | 1.1701           |
| 5'-M-tRNA-Arg-CCT-4-1_L18 | -0.3822     | 0.6824    | -1.5064        | 0.1320         | 0.4150          | 1.1220           |
| 5'-M-tRNA-Ala-TGC-4-1_L23 | 0.2152      | 1.2402    | 1.6799         | 0.0930         | 0.9648          | 1.5942           |
| 5'-M-tRNA-Lys-TTT-5-1_L22 | 0.7238      | 2.0623    | 2.8348         | 0.0046         | 1.2503          | 3.4018           |
| 5'-M-tRNA-Ala-TGC-4-1_L16 | -0.4262     | 0.6530    | -1.4640        | 0.1432         | 0.3691          | 1.1553           |

\*Note: Coefficients estimated from the multivariate Cox regression model were used to calculate tRF score.

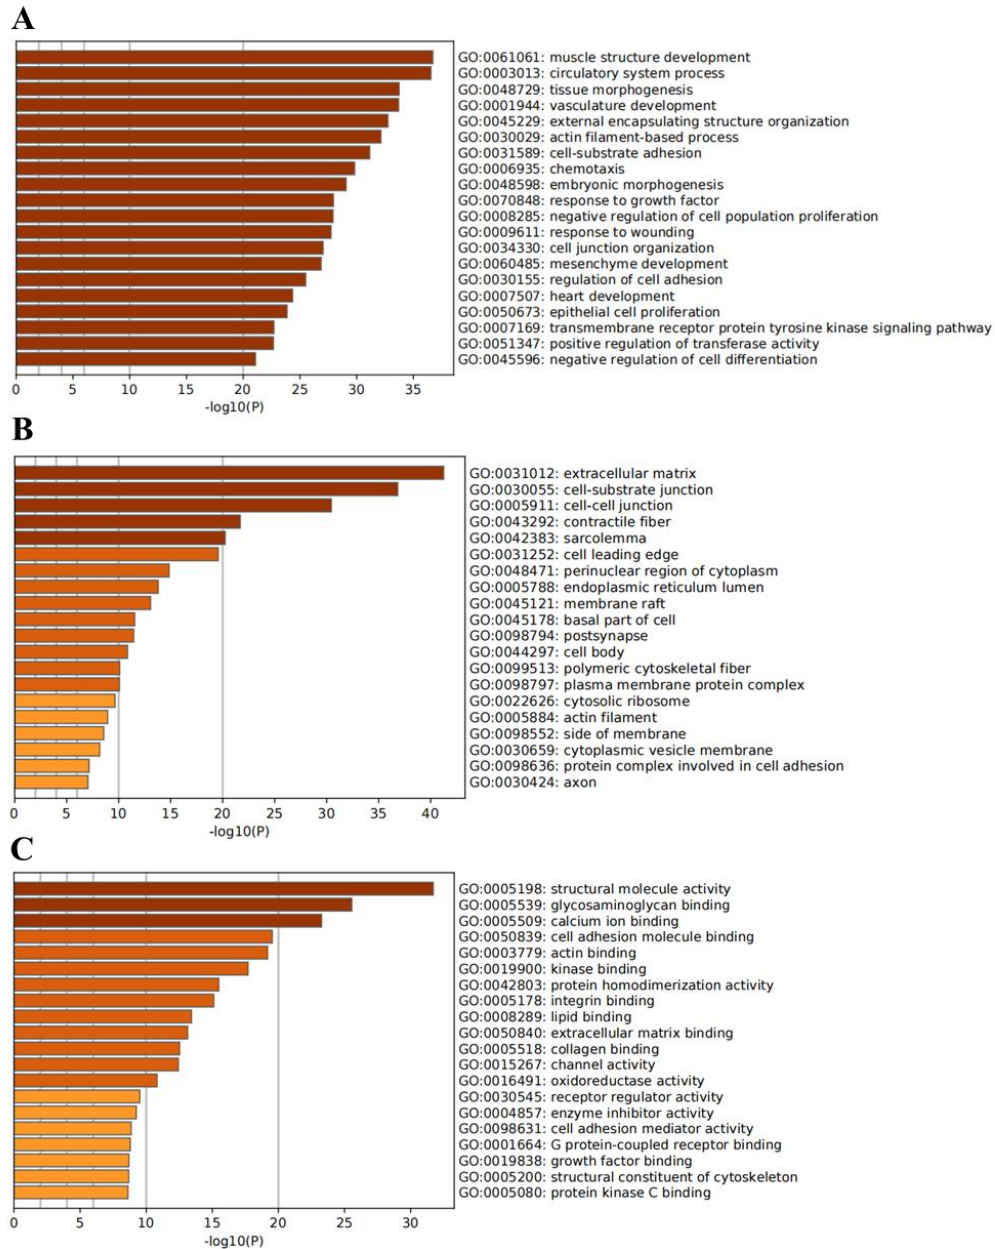

**Figure S1 GO terms enriched for mRNA genes that were co-expressed with significantly dysregulated 5'-tRFs. Related to Figure 1. (A) Biological process. (B) Cellular component. (C) Molecular function.**

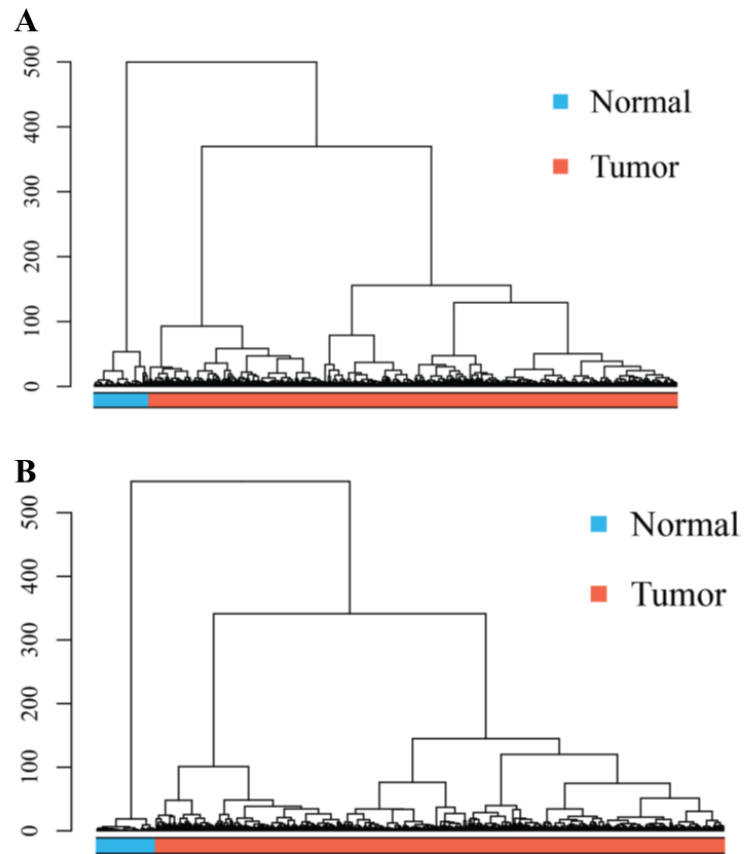

**Figure S2 Hierarchical cluster analyses of PRAD specimens using 5'-tRF expression profiles.** Related to Figure 2. **(A)** 70 5'-tRFs differentially expressed between PRAD tumor and adjacent normal tissues. **(B)** 63 5'-tRFs upregulated in PRAD tumors.

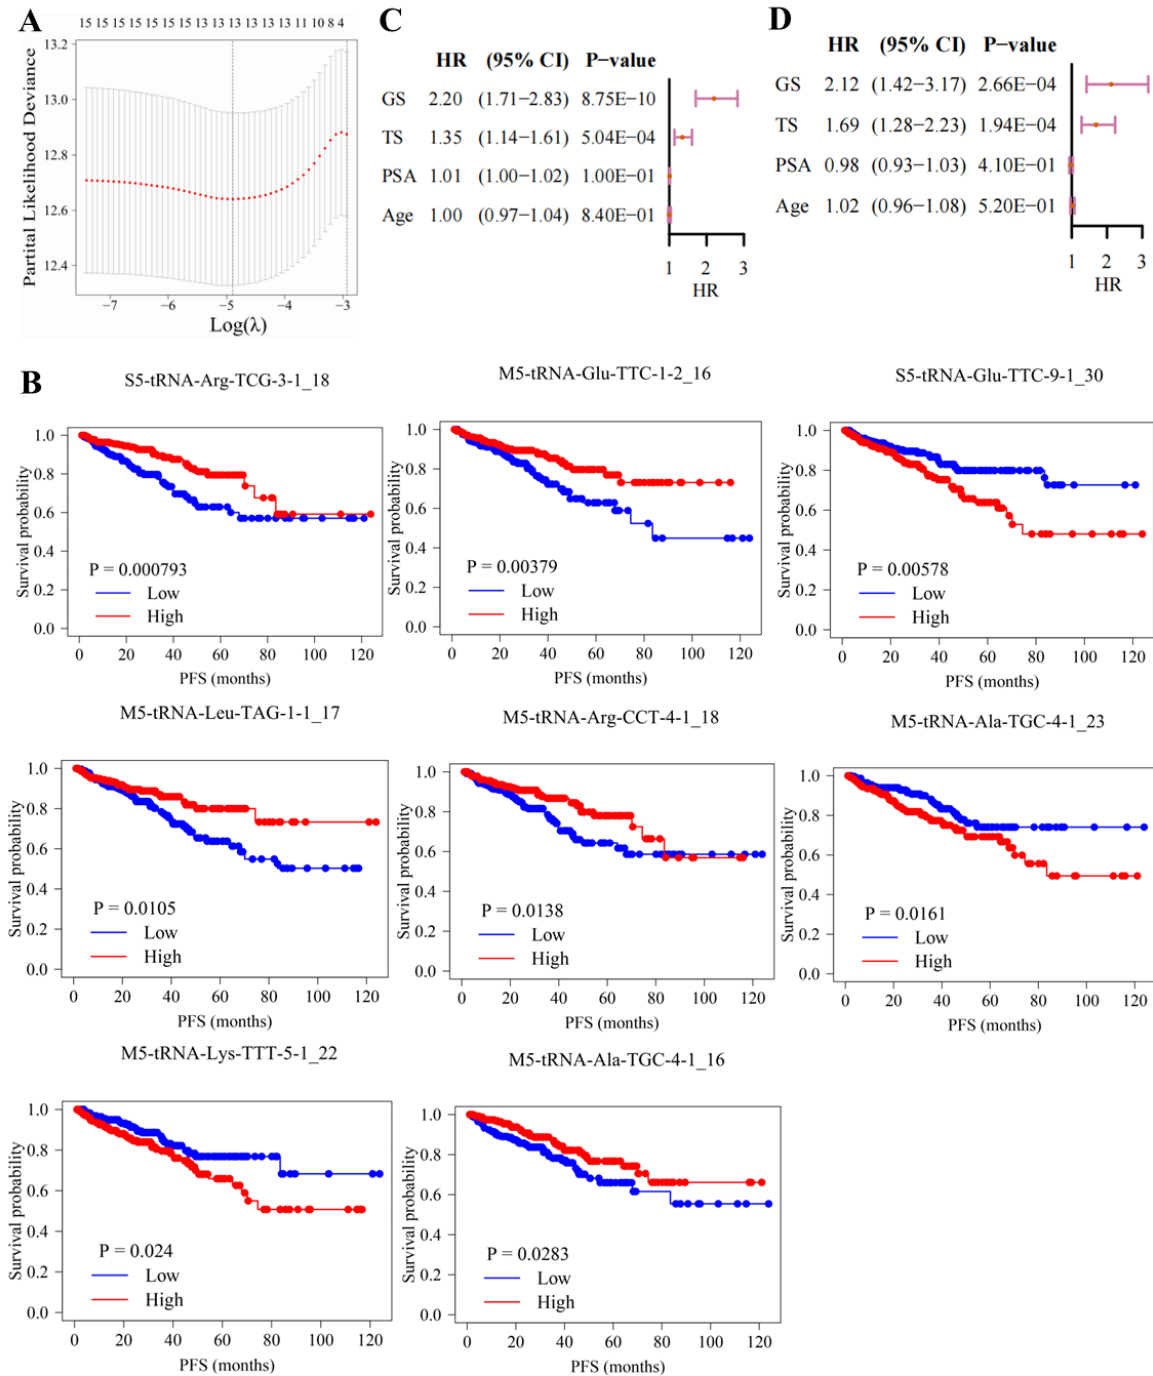

**Figure S3 5'-tRFs are associated with the prognosis of PRAD.** Related to Figure 3. **(A)** Partial likelihood deviance versus lambda relationship in LASSO. According to the partial likelihood deviance, a subset of 13 5'-tRF that minimizes prediction error of PFS were identified. **(B)** Kaplan-Meier curves of PFS of PRAD patients with low vs high 5'-tRF expression. Eight 5'-tRFs included in the tRF score were analyzed separately, including S5-tRNA-Arg-TCG-3-1\_18, M5-tRNA-Glu-TTC-1-2\_16, M5-tRNA-Leu-TAG-1-1\_17, M5-tRNA-Arg-CCT-4-1\_18, M5-tRNA-Ala-TGC-4-1\_16, S5-tRNA-Glu-TTC-9-1\_30, M5-tRNA-Ala-TGC-4-1\_23, and M5-tRNA-Lys-TTT-5-1\_22. **(C, D)** HRs and their 95% CI of GS, TS, PSA and age estimations from the multivariate Cox regression model for PFS (C) and DFS (D).



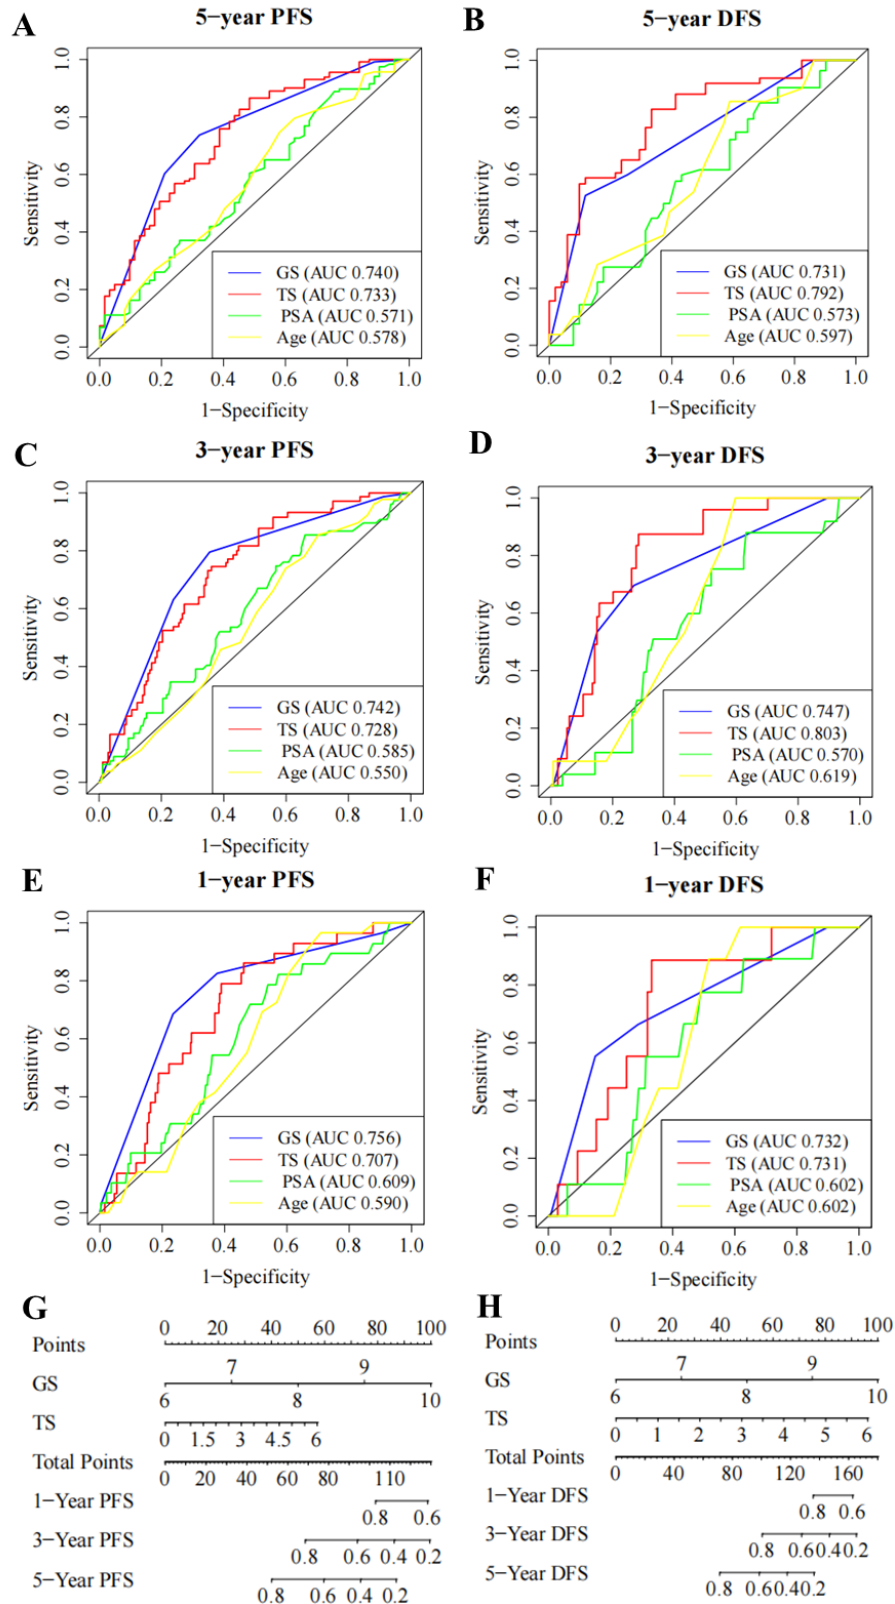

**Figure S4 Prognostic performance of Gleason score, tRF score, PSA and age.** Related to Figure 4. (A, C, E) ROC curves to evaluate the prognostic performance of 5-year (A), 3-year (C) and 1-year (E) PFS using TS, GS, PSA, or age. (B, D, F) ROC curves to evaluate the prognostic performance of 5-year (B), 3-year (D) and 1-year (F) DFS using TS, GS, PSA, or age. (G, H) Nomograms to estimate the risk of PFS (G) and DFS (H) in PRAD patients.

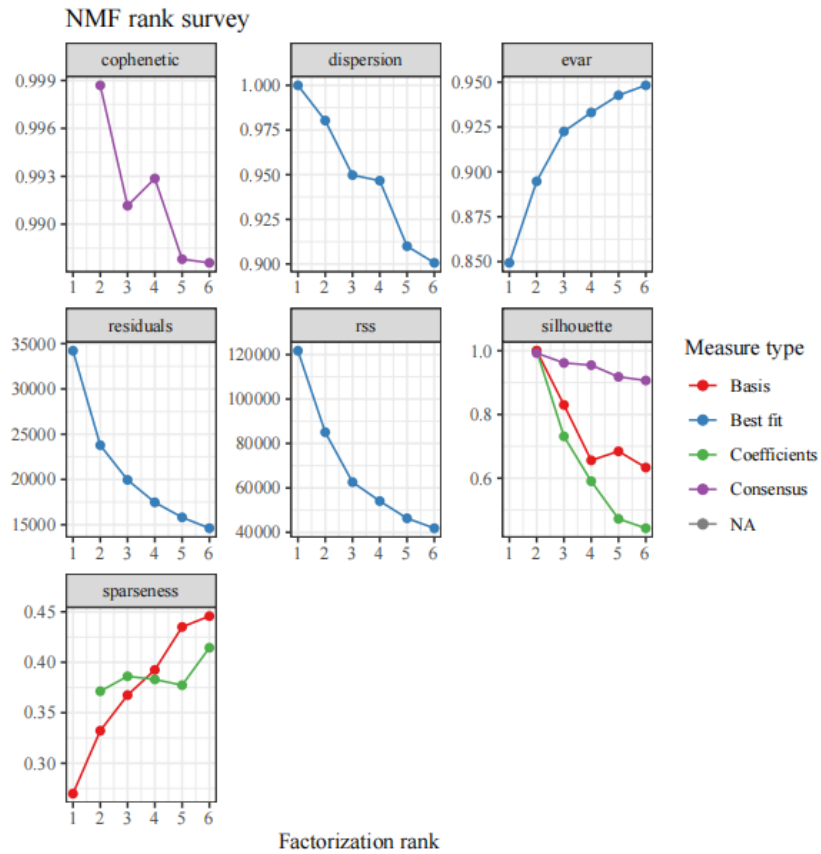

**Figure S5 Determining an optimal number of tRF subtypes PRAD in HNSC.** Related to Figure 5. The cophenetic correlation coefficient is a measure of the dispersion of the consensus matrix based on the average of connectivity matrices. It measures the stability of the 5'-tRF clusters obtained from NMF analysis of 5'-tRF expression data in PRAD.

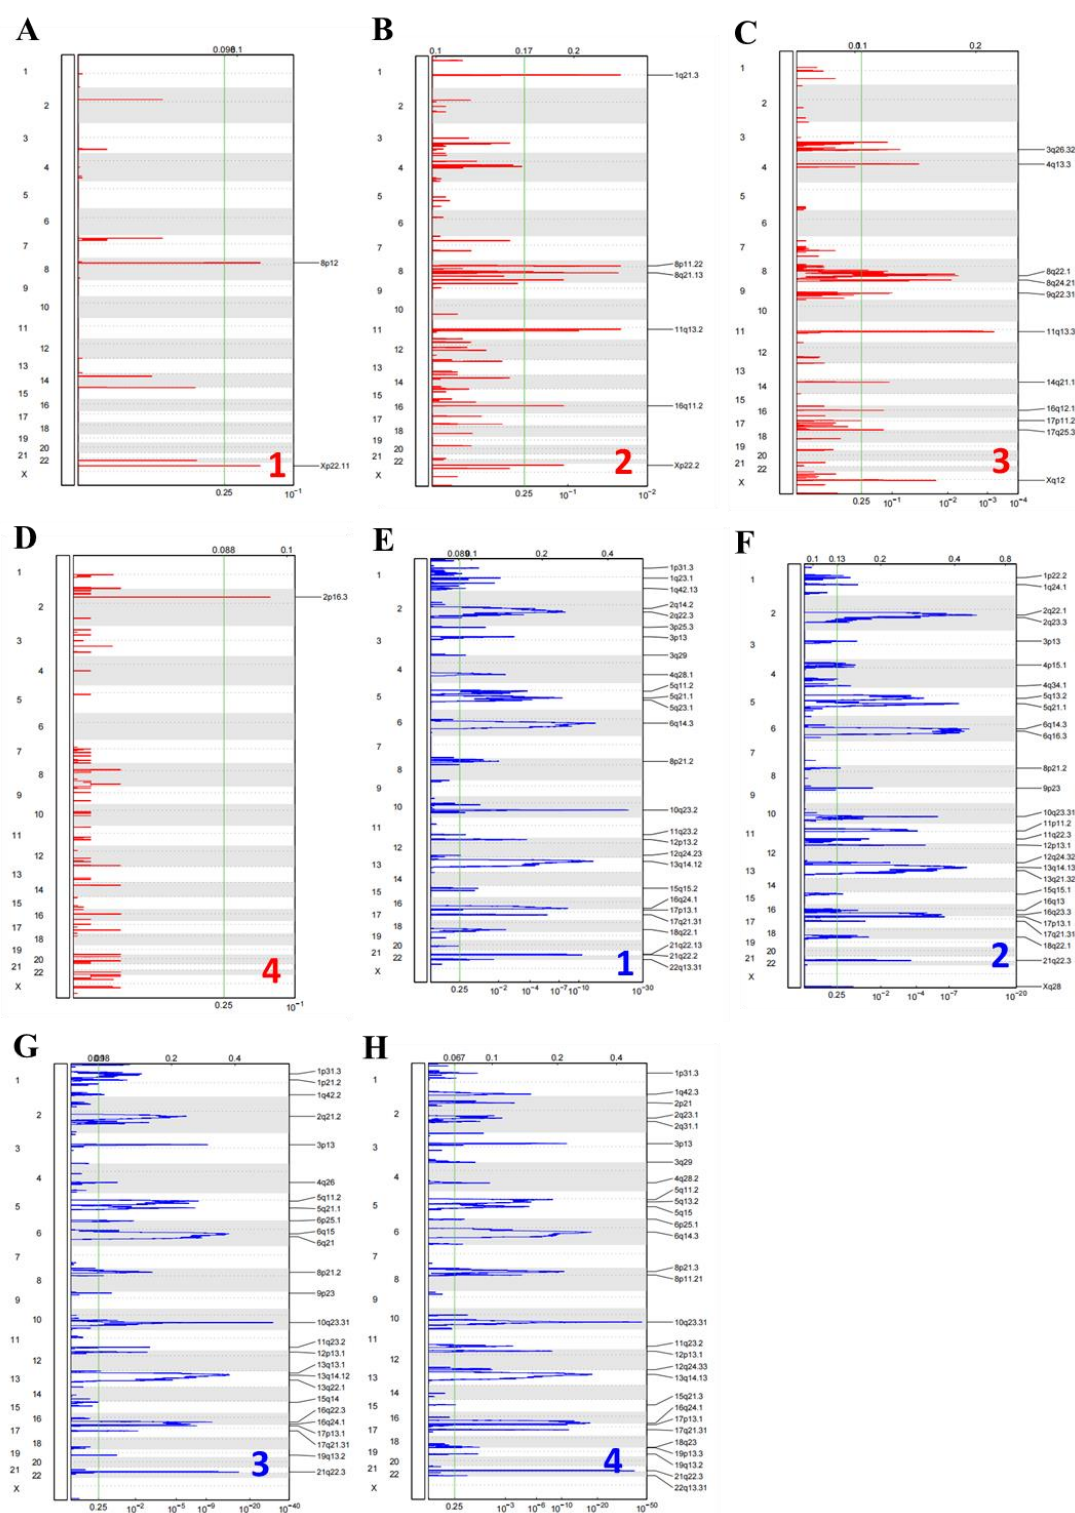

**Figure S6 Copy number gain and loss in 5'-tRFs tumor subtypes.** Related to Figure 6. (A-D) Somatic gain of copy number in four 5'-tRFs tumor subtypes. (E-H) Somatic loss of copy number in four 5'-tRFs tumor subtypes. The numbers 1, 2, 3 and 4 at the lower right corner of each panel indicate 5'-tRFs tumor subtypes, tRF-1, tRF-2, tRF-3, and tRF-4, respectively.
